# Supplementary material
Source: PubMed Central journal article supplement (PMC3173025)
Supplement: supp_94.4.1071_supplTable2.pdf [file supp_94.4.1071_supplTable2.pdf]

Supplemental Table 2: Prevalence and odds ratios for albuminuria for black REGARDS participants associated with quintile of dietary sodium to potassium ratio intake for normal weight, overweight, and obese

| Quintile of Dietary Sodium to Potassium Ratio (Range) |           |                      |                      |                      |                      |
|-------------------------------------------------------|-----------|----------------------|----------------------|----------------------|----------------------|
|                                                       | Q1        | Q2                   | Q3                   | Q4                   | Q5                   |
| Men                                                   | 0.24-0.70 | 0.70-0.83            | 0.83-0.96            | 0.96-1.12            | 1.12-2.92            |
| Women                                                 | 0.07-0.62 | 0.62-0.76            | 0.76-0.90            | 0.90-1.07            | 1.07-2.52            |
| Model 1                                               |           |                      |                      |                      |                      |
| Normal Weight                                         | ref       | 0.97<br>(0.52, 1.81) | 1.09<br>(0.60, 1.98) | 1.23<br>(0.72, 2.22) | 1.49<br>(0.88, 2.54) |
| Overweight                                            | ref       | 0.84<br>(0.55, 1.27) | 0.88<br>(0.57, 1.33) | 1.06<br>(0.73, 1.56) | 1.47<br>(1.04, 2.08) |
| Obese                                                 | ref       | 1.18<br>(0.84, 1.66) | 1.06<br>(0.76, 1.48) | 1.20<br>(0.87, 1.65) | 1.26<br>(0.93, 1.70) |
| Model 2                                               |           |                      |                      |                      |                      |
| Normal Weight                                         | ref       | 0.94<br>(0.50, 1.76) | 1.09<br>(0.60, 1.99) | 1.21<br>(0.69, 2.14) | 1.40<br>(0.82, 2.40) |
| Overweight                                            | ref       | 0.84<br>(0.55, 1.27) | 0.87<br>(0.57, 1.33) | 1.07<br>(0.73, 1.57) | 1.48<br>(1.04, 2.09) |
| Obese                                                 | ref       | 1.20<br>(0.85, 1.68) | 1.07<br>(0.77, 1.50) | 1.21<br>(0.88, 1.67) | 1.28<br>(0.95, 1.72) |
| Model 3                                               |           |                      |                      |                      |                      |
| Normal Weight                                         | ref       | 0.97<br>(0.51, 1.86) | 1.02<br>(0.55, 1.89) | 1.02<br>(0.57, 1.85) | 1.13<br>(0.65, 1.97) |
| Overweight                                            | ref       | 0.87<br>(0.57, 1.34) | 0.86<br>(0.56, 1.33) | 1.09<br>(0.74, 1.61) | 1.33<br>(0.93, 1.90) |
| Obese                                                 | ref       | 1.17<br>(0.83, 1.65) | 1.08<br>(0.77, 1.52) | 1.12<br>(0.81, 1.55) | 1.17<br>(0.86, 1.59) |
| Model 4                                               |           |                      |                      |                      |                      |
| Normal Weight                                         | ref       | 0.94<br>(0.48, 1.84) | 0.95<br>(0.50, 1.81) | 1.05<br>(0.57, 1.93) | 1.03<br>(0.58, 1.83) |
| Overweight                                            | ref       | 0.83<br>(0.54, 1.28) | 0.87<br>(0.56, 1.35) | 1.06<br>(0.71, 1.85) | 1.33<br>(0.93, 1.91) |
| Obese                                                 | ref       | 1.15<br>(0.81, 1.64) | 1.07<br>(0.76, 1.51) | 1.14<br>(0.82, 1.59) | 1.17<br>(0.86, 1.60) |

Numbers presented in the table are odds ratios and 95% confidence intervals.

Model 1 is adjusted for age and total caloric intake.

Model 2 is adjusted for variables in model 1 and gender.

Model 3 is adjusted for variables in model 2, education category, income category, smoking status, alcohol consumption, self-reported health status, and physical activity category.

Model 4 is adjusted for variables in model 3, dyslipidemia, hypertension, and diabetes mellitus.

Normal weight: 18.5-24.9 kg/m<sup>2</sup>, Overweight: 25 - 29.9 kg/m<sup>2</sup>, Obese: 30+ kg/m<sup>2</sup>

<sup>§</sup> Albuminuria defined as a urine albumin to creatinine ratio  $\geq 30$  mg/g.
