# Supplementary material
Source: PubMed Central journal article supplement (PMC3173025)
Supplement: supp_94.4.1071_supplTable3.pdf [file supp_94.4.1071_supplTable3.pdf]

Supplemental Table 3: Prevalence and odds ratios for albuminuria associated with gender-specific quintile of dietary sodium intake for normal weight, overweight, and obese REGARDS participants.

| Quintile of Dietary Sodium (Range, milligrams/day) |       |                      |                      |                      |                      |
|----------------------------------------------------|-------|----------------------|----------------------|----------------------|----------------------|
|                                                    | Q1    | Q2                   | Q3                   | Q4                   | Q5                   |
| Men                                                | <1603 | 1603-2076            | 2076-2580            | 2580-3272            | ≥ 3272               |
| Women                                              | <1276 | 1276-1684            | 1684-2142            | 2142-2768            | ≥ 2769               |
| Prevalence of albuminuria, %                       |       |                      |                      |                      |                      |
| Normal Weight                                      | 13.3  | 10.6                 | 11.1                 | 10.9                 | 11.5                 |
| Overweight                                         | 13.6  | 11.2                 | 11.8                 | 9.9                  | 11.9                 |
| Obese                                              | 15.5  | 15.9                 | 15.6                 | 15.9                 | 16.9                 |
| Odds ratios for albuminuria (95% CI)               |       |                      |                      |                      |                      |
| Model 1                                            |       |                      |                      |                      |                      |
| Normal Weight                                      | ref   | 0.73<br>(0.55, 0.96) | 0.75<br>(0.55, 1.01) | 0.73<br>(0.52, 1.03) | 0.72<br>(0.45, 1.15) |
| Overweight                                         | ref   | 0.83<br>(0.66, 1.04) | 0.89<br>(0.70, 1.13) | 0.77<br>(0.59, 1.02) | 1.03<br>(0.72, 1.48) |
| Obese                                              | ref   | 1.03<br>(0.84, 1.28) | 1.02<br>(0.82, 1.28) | 1.08<br>(0.84, 1.38) | 1.19<br>(0.86, 1.65) |
| Model 2                                            |       |                      |                      |                      |                      |
| Normal Weight                                      | ref   | 0.84<br>(0.63, 1.11) | 0.91<br>(0.67, 1.24) | 0.95<br>(0.66, 1.36) | 0.97<br>(0.59, 1.59) |
| Overweight                                         | ref   | 0.92<br>(0.73, 1.15) | 1.06<br>(0.83, 1.35) | 0.98<br>(0.73, 1.31) | 1.42<br>(0.97, 2.09) |
| Obese                                              | ref   | 1.13<br>(0.92, 1.41) | 1.20<br>(0.95, 1.51) | 1.34<br>(1.04, 1.74) | 1.66<br>(1.18, 2.34) |
| Model 3                                            |       |                      |                      |                      |                      |
| Normal Weight                                      | ref   | 0.88<br>(0.66, 1.19) | 1.01<br>(0.73, 1.39) | 1.09<br>(0.75, 1.59) | 1.07<br>(0.64, 1.78) |
| Overweight                                         | ref   | 0.94<br>(0.74, 1.19) | 1.09<br>(0.85, 1.41) | 1.04<br>(0.78, 1.40) | 1.49<br>(1.00, 2.22) |
| Obese                                              | ref   | 1.12<br>(0.90, 1.40) | 1.25<br>(0.98, 1.59) | 1.31<br>(1.00, 1.71) | 1.68<br>(1.18, 2.40) |
| Model 4                                            |       |                      |                      |                      |                      |
| Normal Weight                                      | ref   | 0.84<br>(0.62, 1.14) | 0.97<br>(0.70, 1.35) | 0.97<br>(0.66, 1.42) | 0.94<br>(0.56, 1.60) |
| Overweight                                         | ref   | 0.90<br>(0.71, 1.14) | 1.04<br>(0.80, 1.35) | 0.93<br>(0.68, 1.26) | 1.23<br>(0.82, 1.85) |
| Obese                                              | ref   | 1.09<br>(0.87, 1.38) | 1.17<br>(0.92, 1.49) | 1.23<br>(0.94, 1.62) | 1.44<br>(1.00, 2.07) |

Numbers presented in the table are odds ratios and 95% confidence intervals.

Model 1 is adjusted for age and total caloric intake.

Model 2 is adjusted for variables in model 1, gender, and race.

Model 3 is adjusted for variables in model 2, education category, income category, smoking status, alcohol consumption, self-reported health status, and physical activity category.

Model 4 is adjusted for variables in model 3, dyslipidemia, hypertension, and diabetes mellitus.

<sup>§</sup> Albuminuria defined as a urine albumin to creatinine ratio  $\geq 30$  mg/g.
