# Supplementary material
Source: PubMed Central journal article supplement (PMC3173025)
Supplement: supp_94.4.1071_supplTable4.pdf [file supp_94.4.1071_supplTable4.pdf]

Supplemental Table 4: Prevalence and odds ratios for albuminuria associated with quintile of gender-specific dietary potassium intake for normal weight, overweight, and obese REGARDs participants.

| Quintile of Dietary Potassium (Range, milligrams/day) |          |                      |                      |                      |                      |
|-------------------------------------------------------|----------|----------------------|----------------------|----------------------|----------------------|
|                                                       | Q1       | Q2                   | Q3                   | Q4                   | Q5                   |
| Men                                                   | 454-1878 | 1879-2403            | 2403-2905            | 2905-3631            | 3631-13812           |
| Women                                                 | 289-1615 | 1615-2108            | 2108-2622            | 2622-3314            | 3314-11883           |
| Prevalence of albuminuria, %                          |          |                      |                      |                      |                      |
| Normal weight                                         | 14.0     | 11.8                 | 10.8                 | 11.0                 | 9.8                  |
| Overweight                                            | 14.0     | 13.3                 | 10.7                 | 10.7                 | 10.3                 |
| Obese                                                 | 17.3     | 16.4                 | 16.3                 | 13.7                 | 16.1                 |
| Odds ratios for albuminuria (95% CI)                  |          |                      |                      |                      |                      |
| Model 1                                               |          |                      |                      |                      |                      |
| Normal Weight                                         | ref      | 0.71<br>(0.54, 0.94) | 0.60<br>(0.45, 0.81) | 0.56<br>(0.41, 0.76) | 0.41<br>(0.28, 0.61) |
| Overweight                                            | ref      | 0.87<br>(0.71, 1.08) | 0.65<br>(0.51, 0.82) | 0.56<br>(0.43, 0.73) | 0.53<br>(0.38, 0.72) |
| Obese                                                 | ref      | 0.87<br>(0.71, 1.06) | 0.82<br>(0.66, 1.00) | 0.61<br>(0.49, 0.78) | 0.63<br>(0.47, 0.85) |
| Model 2                                               |          |                      |                      |                      |                      |
| Normal Weight                                         | ref      | 0.81<br>(0.61, 1.08) | 0.73<br>(0.54, 0.99) | 0.71<br>(0.52, 0.99) | 0.58<br>(0.38, 0.87) |
| Overweight                                            | ref      | 0.97<br>(0.78, 1.21) | 0.76<br>(0.60, 0.97) | 0.71<br>(0.54, 0.92) | 0.72<br>(0.51, 1.00) |
| Obese                                                 | ref      | 0.96<br>(0.78, 1.17) | 0.95<br>(0.76, 1.17) | 0.74<br>(0.58, 0.94) | 0.82<br>(0.61, 1.11) |
| Model 3                                               |          |                      |                      |                      |                      |
| Normal Weight                                         | ref      | 0.91<br>(0.68, 1.23) | 0.97<br>(0.70, 1.33) | 1.00<br>(0.71, 1.42) | 0.94<br>(0.61, 1.45) |
| Overweight                                            | ref      | 1.05<br>(0.84, 1.32) | 0.89<br>(0.69, 1.14) | 0.83<br>(0.63, 1.10) | 0.95<br>(0.67, 1.35) |
| Obese                                                 | ref      | 0.99<br>(0.80, 1.22) | 1.02<br>(0.82, 1.28) | 0.78<br>(0.61, 1.01) | 1.00<br>(0.73, 1.36) |
| Model 4                                               |          |                      |                      |                      |                      |
| Normal Weight                                         | ref      | 0.87<br>(0.64, 1.19) | 0.95<br>(0.68, 1.32) | 0.97<br>(0.68, 1.38) | 0.91<br>(0.59, 1.42) |
| Overweight                                            | ref      | 1.00<br>(0.80, 1.26) | 0.84<br>(0.65, 1.09) | 0.79<br>(0.59, 1.06) | 0.86<br>(0.60, 1.23) |
| Obese                                                 | ref      | 0.95<br>(0.76, 1.17) | 1.01<br>(0.80, 1.26) | 0.75<br>(0.57, 0.97) | 0.88<br>(0.63, 1.21) |

Numbers presented in the table are odds ratios and 95% confidence intervals.

Model 1 is adjusted for age and total caloric intake.

Model 2 is adjusted for variables in model 1, gender, and race.

Model 3 is adjusted for variables in model 2, education category, income category, smoking status, alcohol consumption, self-reported health status, and physical activity category.

Model 4 is adjusted for variables in model 3, dyslipidemia, hypertension, and diabetes mellitus.

<sup>§</sup> Albuminuria defined as a urine albumin to creatinine ratio  $\geq 30$  mg/g.
